# Supplementary material
Source: bioRxiv or medRxiv preprint supplement (https://www.biorxiv.org/highwire/filestream/86441/field_highwire_adjunct_files/3/090795-12.pdf)
Supplement: Supplementary file [file 090795-12.pdf]

# PID

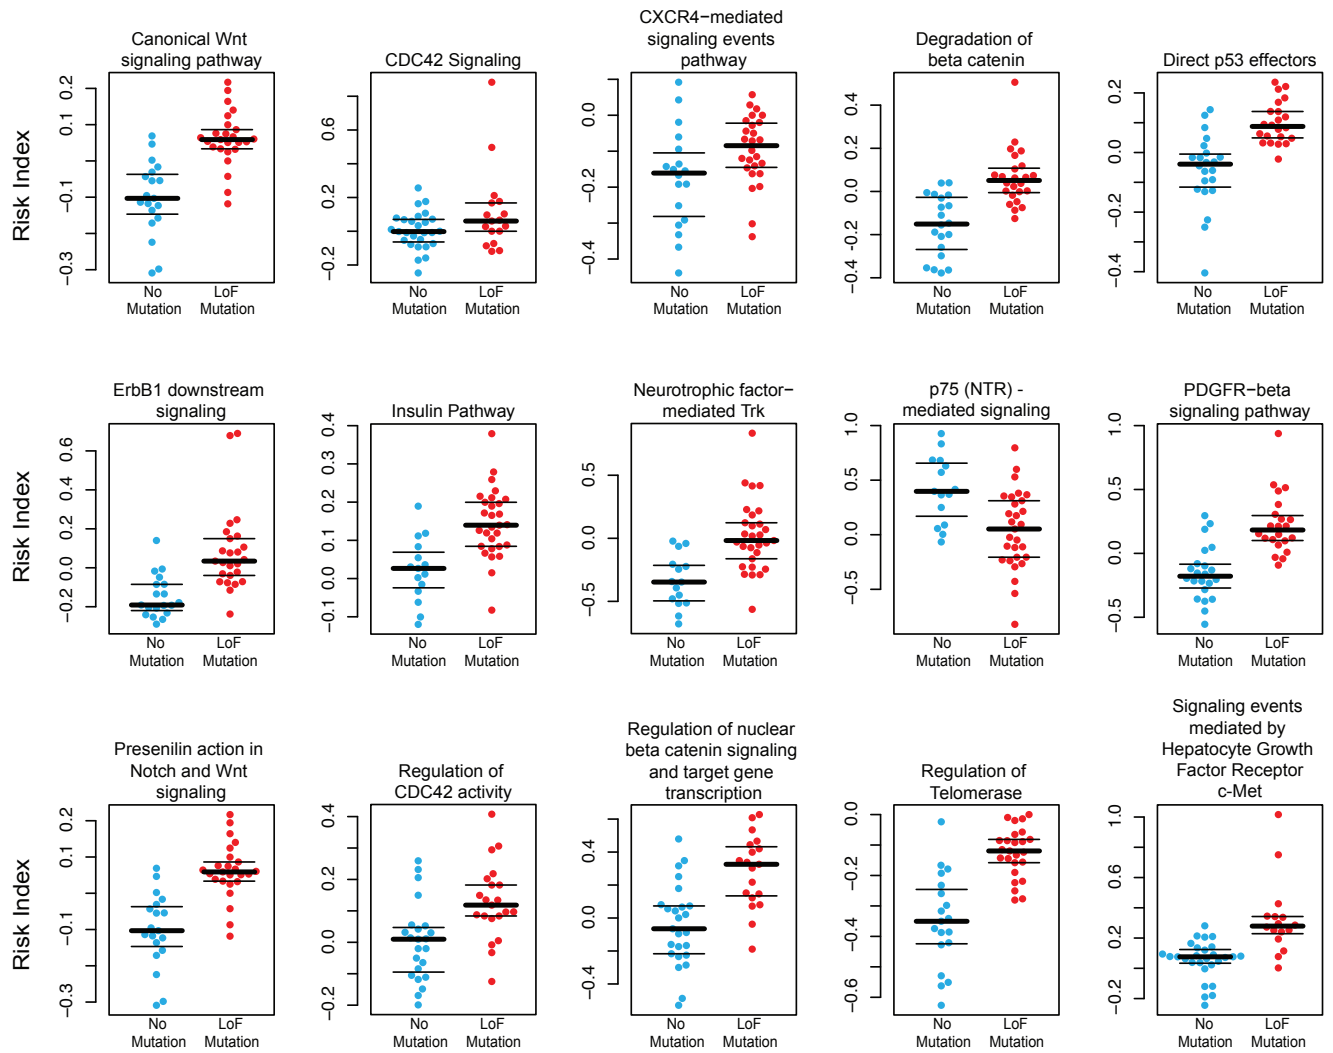

S10 Fig. LoF mutations in PID pathways can be predicted using a risk index as a classifier (y-axis).
